# Supplementary material for: Investigations on SARS-CoV-2 Susceptibility of Domestic and Wild Animals Using Primary Cell Culture Models Derived from the Upper and Lower Respiratory Tract
Source: MDPI journal article supplement (doi:10.3390/v14040828), 2022-04-16
Supplement: s1 [file s1]

**Supplementary Material Figure S1.** Ciliary activity of SARS-CoV-2 infected PCLS. Ciliary activity of infected (SARS-CoV-2, purple) and uninfected (mock, blue) PCLS was semi-quantitatively determined by light microscopy. The graphs show the means and SD of n replicates as indicated in each graph.

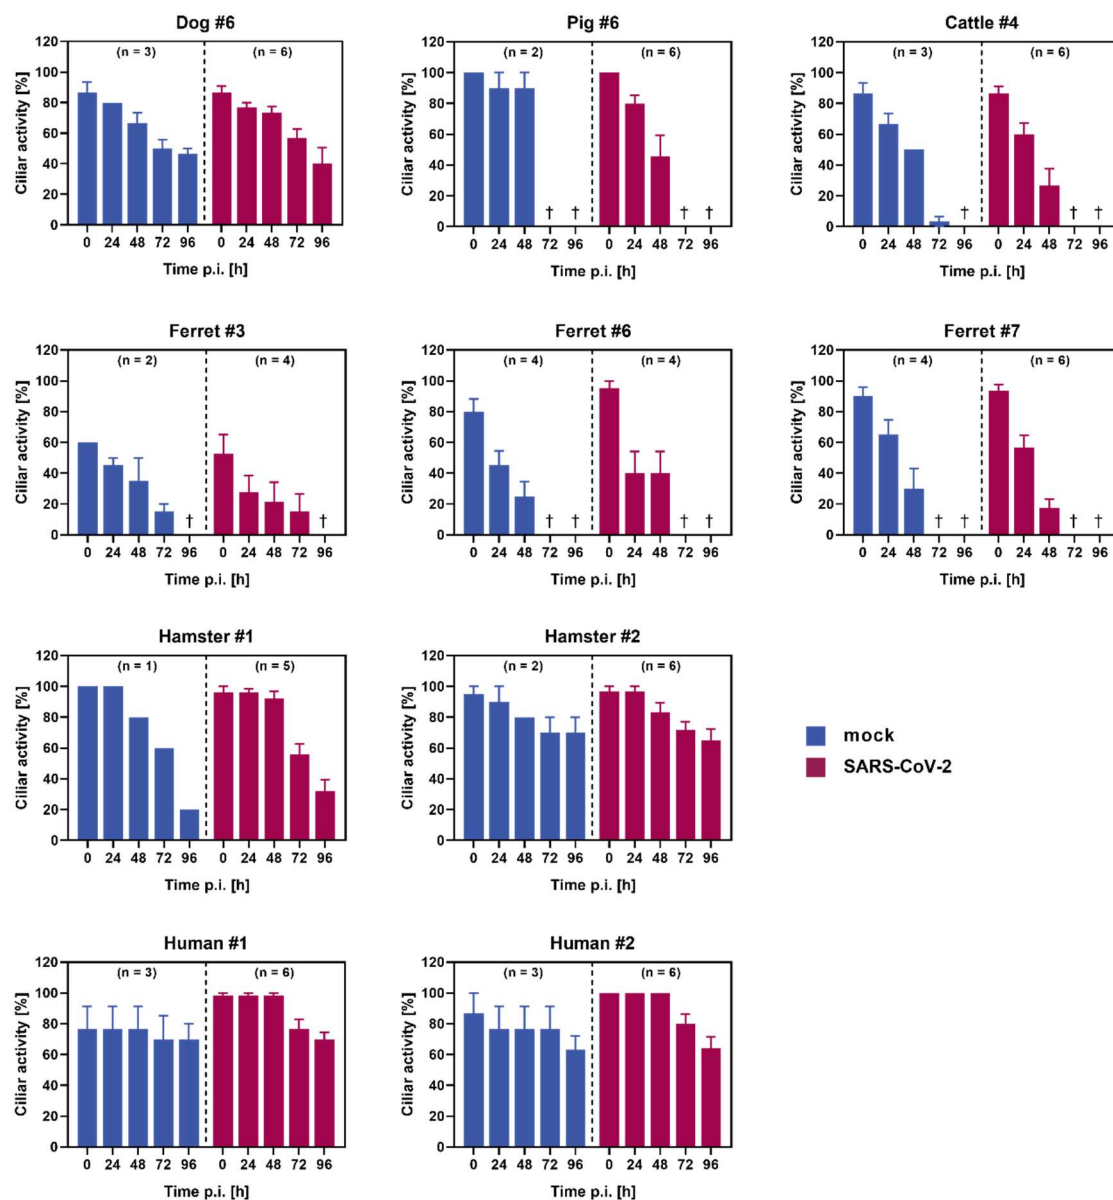

<sup>1</sup>Abbreviations: PCLS, precision-cut lung slices; p.i., post infection; SARS-CoV-2, severe acute respiratory syndrome coronavirus 2; SD, standard deviation;

**Supplementary Material Table S1.** ACE2 mRNA expression within the upper and lower respiratory tract of mammalian species.

| Family                   | Species                                 | ID<br>(Internal<br>Identification<br>Number) | Nasal mucosa | Trachea | Lung  | Kidney |
|--------------------------|-----------------------------------------|----------------------------------------------|--------------|---------|-------|--------|
| Canidae <sup>1</sup>     | Dog ( <i>Canis lupus familiaris</i> )   | Dog #1 (S656/21)                             | 71859        | 105     | 77    | nd     |
|                          |                                         | Dog #2 (S745/21)                             | 3391         | 29      | 18    | nd     |
|                          |                                         | Dog #7 (S773/21)                             | 9858         | 186     | 0     | nd     |
|                          |                                         | Dog #8 (S546/21)                             | n/a          | 493     | 1     | nd     |
|                          |                                         | Dog #9 (S585/20)                             | n/a          | 4       | 1     | 839    |
|                          |                                         | Dog #10 (S624/20)                            | n/a          | 83      | 23    | nd     |
|                          |                                         | Dog #11 (S645/20)                            | n/a          | 60      | 8     | nd     |
|                          |                                         | Dog #12 (S690/20)                            | n/a          | 7       | 1     | nd     |
|                          | Golden Jackal ( <i>Canis aureus</i> )   | Jackal #1 (S542/20)                          | n/a          | 19      | 15    | 147    |
| Mustelidae <sup>1</sup>  | Ferret ( <i>Mustela putorius furo</i> ) | Ferret #1 (V385/20)                          | 1369         | 2393    | 160   | nd     |
|                          |                                         | Ferret #3 (V713/20)                          | n/a          | 0       | 13    | nd     |
|                          |                                         | Ferret #4 (V749/20)                          | n/a          | 4652    | 22    | nd     |
|                          |                                         | Ferret #7 (V919/20)                          | n/a          | 6       | 22    | nd     |
|                          |                                         | Ferret #9 (V920/20)                          | n/a          | 23      | 8     | nd     |
| Procyonidae <sup>1</sup> | Raccoon ( <i>Procyon lotor</i> )        | Raccoon #1 (S651/20)                         | n/a          | 18      | 7     | 11369  |
|                          |                                         | Raccoon #2 (S652/20)                         | n/a          | 26      | 2     | nd     |
|                          |                                         | Raccoon #3 (S656/20)                         | n/a          | 6       | 6     | 2183   |
|                          |                                         | Raccoon #4 (S697/20)                         | n/a          | 28      | 2     | nd     |
|                          |                                         | Raccoon #5 (S775/20)                         | n/a          | 0       | 11    | nd     |
| Ailuridae <sup>1</sup>   | Red Panda ( <i>Ailurus fulgens</i> )    | Red Panda #1 (S525/20)                       | n/a          | 21      | 25    | 38299  |
| Leporidae <sup>2</sup>   | Rabbit ( <i>Oryctolagus cuniculus</i> ) | Rabbit #1 (S715/20)                          | n/a          | 13361   | 19065 | nd     |
|                          |                                         | Rabbit #2 (S946/20)                          | n/a          | 2453    | 3163  | nd     |

|                         |                                      |                         |     |       |       |     |
|-------------------------|--------------------------------------|-------------------------|-----|-------|-------|-----|
|                         |                                      | Rabbit #3<br>(S1002/20) | n/a | 22693 | 1849  | nd  |
|                         |                                      | Rabbit #4<br>(S1063/20) | n/a | 54833 | 20601 | nd  |
| Suidae <sup>2</sup>     | Pig ( <i>Sus scrofa domestica</i> )  | Pig #7<br>(S620/20)     | n/a | 112   | 5     | 181 |
|                         |                                      | Pig #8<br>(S674/20)     | n/a | 3     | 18    | nd  |
|                         |                                      | Pig #9<br>(S731/20)     | n/a | 8     | 5     | 234 |
|                         |                                      | Pig #10<br>(S709/20)    | n/a | 14    | 6     | nd  |
|                         |                                      | Pig #11<br>(S856/20)    | n/a | 19    | 11    | 215 |
|                         | Wild boar ( <i>Sus scrofa</i> )      | Wild boar #1 (S565/20)  | n/a | 109   | 19    | 568 |
| Bovidae <sup>2</sup>    | Cattle ( <i>Bos taurus</i> )         | Cattle #2<br>(S657/20)  | n/a | 19    | 131   | nd  |
|                         |                                      | Cattle #3<br>(S680/20)  | n/a | 6     | 0     | nd  |
|                         |                                      | Cattle #5<br>(S704/20)  | n/a | 671   | 108   | nd  |
|                         |                                      | Cattle #6<br>(S765/20)  | n/a | 71    | 86    | nd  |
|                         |                                      | Cattle #7<br>(S819/20)  | n/a | 191   | 36    | nd  |
|                         | Sheep ( <i>Ovis aries</i> )          | Sheep #1<br>(S687/20)   | n/a | 55    | 0     | nd  |
|                         |                                      | Sheep #2<br>(S720/20)   | n/a | 1557  | 9     | nd  |
|                         |                                      | Sheep #3<br>(S787/20)   | n/a | 1697  | 535   | nd  |
|                         |                                      | Sheep #4<br>(S809/20)   | n/a | 2252  | 61    | nd  |
|                         | Goat ( <i>Capra hircus</i> )         | Goat #1<br>(S602/20)    | n/a | 1215  | 3     | nd  |
|                         |                                      | Goat #2<br>(S644/20)    | n/a | 8001  | 248   | nd  |
|                         |                                      | Goat #3<br>(S722/20)    | n/a | 5360  | 0     | nd  |
|                         |                                      | Goat #4<br>(S788/20)    | n/a | 2143  | 7075  | nd  |
|                         | Nyala ( <i>Tragelaphus angasii</i> ) | Nyala #1<br>(S601/20)   | n/a | 386   | 305   | 256 |
| Cervidae <sup>2</sup>   | Moose ( <i>Alces alces</i> )         | Moose #1<br>(S612/20)   | n/a | 182   | 3     | 60  |
| Giraffidae <sup>2</sup> | Giraffe ( <i>Giraffa sp.</i> )       | Giraffe #1<br>(S755/20) | n/a | 3216  | 33    | nd  |
| Camelidae <sup>2</sup>  | Camel ( <i>Camelus bactrianus</i> )  | Camel #1<br>(S747/20)   | n/a | 2719  | 1     | 61  |

|                        |                                 |                        |     |       |       |    |
|------------------------|---------------------------------|------------------------|-----|-------|-------|----|
|                        | Alpaca ( <i>Vicugna pacos</i> ) | Alpaca #1 (S614/20)    | n/a | 173   | 4     | nd |
|                        |                                 | Alpaca #2 (S615/20)    | n/a | 13644 | 11521 | nd |
|                        |                                 | Alpaca #3 (S758/20)    | n/a | 12219 | 3667  | nd |
| Equidae <sup>2</sup>   | Horse ( <i>Equus caballus</i> ) | Horse #1 (S583/20)     | n/a | 8655  | 1387  | nd |
|                        |                                 | Horse #2 (S617/20)     | n/a | 10615 | 20454 | nd |
|                        |                                 | Horse #3 (S633/20)     | n/a | 7     | 13    | nd |
|                        |                                 | Horse #4 (S649/20)     | n/a | 62    | 10    | nd |
|                        |                                 | Horse #5 (S721/20)     | n/a | 35    | 522   | nd |
| Homonidae <sup>2</sup> | Orangutan ( <i>Pongo sp.</i> )  | Orangutan #1 (S794/20) | n/a | 999   | 693   | nd |

<sup>1</sup>ACE2 mRNA expression is given as genomic equivalents (GE)/ 1 µg RNA. The table shows mean values for each animal and organ measured as quintuplicates. Threshold: primer pair 1: 78.69, primer pair 2: 19.6. Superscripted numbers indicate the primer pair used for qPCR.

<sup>2</sup>Abbreviations: ACE2, angiotensin-converting enzyme 2; n/a, no organ sample available; nd, not determined;

**Supplementary Material Table S2.** *TMPRSS2* mRNA expression within the upper and lower respiratory tract of mammalian species.

| Family     | Species                                 | Sample ID            | Nasal mucosa | Trachea  | Lung    |
|------------|-----------------------------------------|----------------------|--------------|----------|---------|
| Felidae    | Cat ( <i>Felis catus</i> )              | Cat #1 (S528/20)     | n/a          | 167296   | 994160  |
|            |                                         | Cat #2 (S793/20)     | n/a          | 1065216  | 873142  |
|            |                                         | Cat #3 (S933/20)     | 197321       | 28284    | 591099  |
|            |                                         | Cat #4 (S984/20)     | 1025943      | 290096   | 6970    |
|            |                                         | Cat #5 (S148/21)     | 110018       | 808028   | 265645  |
|            |                                         | Cat #6 (S169/21)     | 1279909      | 2318157  | 74213   |
|            | Lion ( <i>Panthera leo</i> )            | Lion #1 (S342/21)    | 5015021      | 6581201  | 377663  |
|            | Cheetah ( <i>Acinonyx jubatus</i> )     | Cheetah #1 (S640/20) | n/a          | 12708    | 13588   |
|            | Lynx ( <i>Lynx</i> sp.)                 | Lynx #1 (S641/20)    | n/a          | 16599720 | 1402511 |
|            |                                         | Lynx #2 (S817/20)    | n/a          | 8208498  | 498033  |
| Canidae    | Dog ( <i>Canis lupus familiaris</i> )   | Dog #1 (S656/21)     | 39523        | 112688   | 7150    |
|            |                                         | Dog #2 (S745/21)     | 15245        | 63429    | 104924  |
|            |                                         | Dog #7 (S773/21)     | 27649        | 51456    | 6690    |
|            |                                         | Dog #8 (S546/20)     | n/a          | 77364    | 47123   |
|            |                                         | Dog #10 (S624/20)    | n/a          | 58445    | 12715   |
|            |                                         | Dog #11 (S645/20)    | n/a          | 9592     | 13151   |
|            |                                         | Dog #12 (S690/20)    | n/a          | 6732     | 73175   |
|            | Golden Jackal ( <i>Canis aureus</i> )   | Jackal #1 (S542/20)  | n/a          | 19852    | 73445   |
| Mustelidae | Ferret ( <i>Mustela putorius furo</i> ) | Ferret #1 (V385/20)  | 913          | 3314     | 6486    |
|            |                                         | Ferret #3 (V713/20)  | n/a          | 4        | 1854    |
|            |                                         | Ferret #4 (V749/20)  | n/a          | 18148    | 8761    |
|            |                                         | Ferret #7 (V919/20)  | n/a          | 16       | 52      |
|            |                                         | Ferret #9 (V920/20)  | n/a          | 579      | 346     |

|             |                                         |                        |     |         |         |
|-------------|-----------------------------------------|------------------------|-----|---------|---------|
| Procyonidae | Raccoon ( <i>Procyon lotor</i> )        | Raccoon #1 (S651/20)   | n/a | 1532    | 1508    |
|             |                                         | Raccoon #2 (S652/20)   | n/a | 203     | 5064    |
|             |                                         | Raccoon #3 (S656/20)   | n/a | 34      | 460     |
|             |                                         | Raccoon #4 (S697/20)   | n/a | 4592    | 5630    |
|             |                                         | Raccoon #5 (S775/20)   | n/a | 3820    | 1080    |
| Ailuridae   | Red Panda ( <i>Ailurus fulgens</i> )    | Red Panda #1 (S525/20) | n/a | 1312    | 2017    |
| Leporidae   | Rabbit ( <i>Oryctolagus cuniculus</i> ) | Rabbit #1 (S715/20)    | n/a | 4685    | 639     |
|             |                                         | Rabbit #2 (S946/20)    | n/a | 27      | 144     |
|             |                                         | Rabbit #3 (S1002/20)   | n/a | 741     | 222     |
|             |                                         | Rabbit #4 (S1063/20)   | n/a | 452     | 1301    |
| Suidae      | Pig ( <i>Sus scrofa domestica</i> )     | Pig #8 (S674/20)       | n/a | 399757  | 42827   |
|             |                                         | Pig #9 (S731/20)       | n/a | 1174548 | 1096693 |
|             |                                         | Pig #10 (S709/20)      | n/a | 2939003 | 55449   |
|             |                                         | Pig #11 (S856/20)      | n/a | 414     | 227423  |
|             | Wild boar ( <i>Sus scrofa</i> )         | Wild boar #1 (S565/20) | n/a | 1643524 | 600377  |
| Bovidae     | Cattle ( <i>Bos taurus</i> )            | Cattle #2 (S657/20)    | n/a | 668     | 4080    |
|             |                                         | Cattle #3 (S680/20)    | n/a | 2466    | 423     |
|             |                                         | Cattle #6 (S765/20)    | n/a | 40776   | 5564    |
|             |                                         | Cattle #7 (S819/20)    | n/a | 1446    | 3521    |
|             | Sheep ( <i>Ovis aries</i> )             | Sheep #1 (S687/20)     | n/a | 953944  | 137656  |
|             |                                         | Sheep #2 (S720/20)     | n/a | 686270  | 259142  |
|             |                                         | Sheep #3 (S787/20)     | n/a | 4280734 | 166232  |
|             |                                         | Sheep #4 (S809/20)     | n/a | 970327  | 224737  |
|             | Goat ( <i>Capra hircus</i> )            | Goat #1 (S602/20)      | n/a | 180736  | 181794  |
|             |                                         | Goat #2 (S644/20)      | n/a | 995039  | 356306  |

|            |                                      |                         |     |         |        |
|------------|--------------------------------------|-------------------------|-----|---------|--------|
|            |                                      | Goat #3<br>(S722/20)    | n/a | 380286  | 24     |
|            |                                      | Goat #4<br>(S788/20)    | n/a | 480001  | 812246 |
|            | Nyala ( <i>Tragelaphus angasii</i> ) | Nyala #1<br>(S601/20)   | n/a | 4466    | 752    |
| Cervidae   | Moose ( <i>Alces alces</i> )         | Moose #1<br>(S612/20)   | n/a | 19868   | 693    |
| Giraffidae | Giraffe ( <i>Giraffa sp.</i> )       | Giraffe #1<br>(S755/20) | n/a | 1510009 | 90756  |
| Camelidae  | Camel ( <i>Camelus bactrianus</i> )  | Camel #1<br>(S747/20)   | n/a | 2794    | 43984  |
|            | Alpaca ( <i>Vicugna pacos</i> )      | Alpaca #1<br>(S614/20)  | n/a | 646367  | 80572  |
|            |                                      | Alpaca #2<br>(S615/20)  | n/a | 2247    | 18027  |
|            |                                      | Alpaca #3<br>(S758/20)  | n/a | 4957    | 37294  |
| Equidae    | Horse ( <i>Equus caballus</i> )      | Horse #1<br>(S583/20)   | n/a | 8       | 5      |
|            |                                      | Horse #2<br>(S617/20)   | n/a | 1468    | 124    |
|            |                                      | Horse #3<br>(S633/20)   | n/a | 26298   | 10028  |
|            |                                      | Horse #4<br>(S649/20)   | n/a | 298     | 200    |
| Homonidae  | Orangutan ( <i>Pongo sp.</i> )       | Orangutan #1 (S794/20)  | n/a | 40392   | 49909  |

<sup>1</sup>TMPS2 mRNA expression is given as genomic equivalents (GE)/ 1 µg RNA. The table shows mean values for each animal and organ measured as quintuplicates. Threshold: 24.09.

<sup>2</sup>Abbreviations: n/a, no organ sample available; TMPS2, transmembrane protease serine subtype 2;

**Supplementary Material Table S3.** *CTSL* mRNA expression within the upper and lower respiratory tract of mammalian species.

| Family      | Species                                 | Sample ID               | Nasal mucosa | Trachea | Lung  |
|-------------|-----------------------------------------|-------------------------|--------------|---------|-------|
| Felidae     | Cat ( <i>Felis catus</i> )              | Cat #1<br>(S528/20)     | n/a          | 2154    | 282   |
|             |                                         | Cat #2<br>(S793/20)     | n/a          | 15721   | 4827  |
|             |                                         | Cat #3<br>(S933/20)     | 29024        | 36      | 51    |
|             |                                         | Cat #4<br>(S984/20)     | 620112       | 23525   | 123   |
|             |                                         | Cat #5<br>(S148/21)     | 13992        | 8737    | 18485 |
|             |                                         | Cat #6<br>(S169/21)     | 113287       | 37958   | 114   |
|             | Lion ( <i>Panthera leo</i> )            | Lion #1<br>(S342/21)    | 239193       | 92602   | 2754  |
|             | Cheetah ( <i>Acinonyx jubatus</i> )     | Cheetah #1<br>(S640/20) | n/a          | 1222    | 1065  |
|             | Lynx ( <i>Lynx sp.</i> )                | Lynx #1<br>(S641/20)    | n/a          | 170994  | 1745  |
|             |                                         | Lynx #2<br>(S817/20)    | n/a          | 50263   | 150   |
| Canidae     | Dog ( <i>Canis lupus familiaris</i> )   | Dog #1<br>(S656/21)     | 93930        | 249153  | 8984  |
|             |                                         | Dog #2<br>(S745/21)     | 51551        | 66810   | 7191  |
|             |                                         | Dog #7<br>(S773/21)     | 20353        | 49694   | 5777  |
|             |                                         | Dog #8<br>(S546/20)     | n/a          | 62359   | 3535  |
|             |                                         | Dog #10<br>(S624/20)    | n/a          | 78608   | 7292  |
|             |                                         | Dog #11<br>(S645/20)    | n/a          | 5507    | 7525  |
|             |                                         | Dog #12<br>(S690/20)    | n/a          | 7772    | 39001 |
|             | Golden Jackal ( <i>Canis aureus</i> )   | Jackal #1<br>(S542/20)  | n/a          | 1795    | 6417  |
| Mustelidae  | Ferret ( <i>Mustela putorius furo</i> ) | Ferret #1<br>(V385/20)  | 383964       | 198445  | 34725 |
|             |                                         | Ferret #3<br>(V713/20)  | n/a          | 0       | 100   |
|             |                                         | Ferret #4<br>(V749/20)  | n/a          | 121390  | 30941 |
|             |                                         | Ferret #7<br>(V919/20)  | n/a          | 13      | 742   |
|             |                                         | Ferret #9<br>(V920/20)  | n/a          | 0       | 104   |
| Procyonidae | Raccoon ( <i>Procyon lotor</i> )        | Raccoon #1<br>(S651/20) | n/a          | 11760   | 396   |



|           |                                         |                         |     |        |       |
|-----------|-----------------------------------------|-------------------------|-----|--------|-------|
|           |                                         | Raccoon #2<br>(S652/20) | n/a | 10     | 212   |
|           |                                         | Raccoon #3<br>(S656/20) | n/a | 2      | 561   |
|           |                                         | Raccoon #4<br>(S697/20) | n/a | 299    | 43    |
|           |                                         | Raccoon #5<br>(S775/20) | n/a | 116    | 438   |
| Ailuridae | Red Panda ( <i>Ailurus fulgens</i> )    | Red Panda #1 (S525/20)  | n/a | 3121   | 5008  |
| Leporidae | Rabbit ( <i>Oryctolagus cuniculus</i> ) | Rabbit #1<br>(S715/20)  | n/a | 113    | 16    |
|           |                                         | Rabbit #2<br>(S946/20)  | n/a | 16     | 791   |
|           |                                         | Rabbit #3<br>(S1002/20) | n/a | 30     | 15    |
|           |                                         | Rabbit #4<br>(S1063/20) | n/a | 82     | 119   |
| Suidae    | Pig ( <i>Sus scrofa domestica</i> )     | Pig #8<br>(S674/20)     | n/a | 39100  | 8930  |
|           |                                         | Pig #9<br>(S731/20)     | n/a | 116039 | 68207 |
|           |                                         | Pig #10<br>(S709/20)    | n/a | 107680 | 103   |
|           |                                         | Pig #11<br>(S856/20)    | n/a | 0      | 2440  |
|           | Wild boar ( <i>Sus scrofa</i> )         | Wild boar #1 (S565/20)  | n/a | 152156 | 39783 |
| Bovidae   | Cattle ( <i>Bos taurus</i> )            | Cattle #2<br>(S657/20)  | n/a | 1435   | 21217 |
|           |                                         | Cattle #3<br>(S680/20)  | n/a | 190435 | 1115  |
|           |                                         | Cattle #6<br>(S765/20)  | n/a | 125415 | 26661 |
|           |                                         | Cattle #7<br>(S819/20)  | n/a | 1095   | 7556  |
|           | Sheep ( <i>Ovis aries</i> )             | Sheep #1<br>(S687/20)   | n/a | 8733   | 49    |
|           |                                         | Sheep #2<br>(S720/20)   | n/a | 4269   | 20    |
|           |                                         | Sheep #3<br>(S787/20)   | n/a | 45793  | 832   |
|           |                                         | Sheep #4<br>(S809/20)   | n/a | 13032  | 88    |
|           | Goat ( <i>Capra hircus</i> )            | Goat #1<br>(S602/20)    | n/a | 3209   | 0     |
|           |                                         | Goat #2<br>(S644/20)    | n/a | 32     | 0     |
|           |                                         | Goat #3<br>(S722/20)    | n/a | 5900   | 0     |

|            |                                                                            |                           |     |       |        |
|------------|----------------------------------------------------------------------------|---------------------------|-----|-------|--------|
|            |                                                                            | Goat #4<br>(S788/20)      | n/a | 47949 | 76945  |
|            | Nyala ( <i>Tragelaphus angasii</i> )                                       | Nyala #1<br>(S601/20)     | n/a | 68987 | 168838 |
| Cervidae   | Moose ( <i>Alces alces</i> )                                               | Moose #1<br>(S612/20)     | n/a | 1170  | 518    |
| Giraffidae | Giraffe ( <i>Giraffa sp.</i> )                                             | Giraffe #1<br>(S755/20)   | n/a | 43968 | 395    |
| Camelidae  | Camel ( <i>Camelus bactrianus</i> )<br><br>Alpaca ( <i>Vicugna pacos</i> ) | Camel #1<br>(S747/20)     | n/a | 21414 | 2      |
|            |                                                                            | Alpaca #1<br>(S614/20)    | n/a | 36    | 58     |
|            |                                                                            | Alpaca #2<br>(S615/20)    | n/a | 418   | 82     |
|            |                                                                            | Alpaca #3<br>(S758/20)    | n/a | 67857 | 0      |
| Equidae    | Horse ( <i>Equus caballus</i> )                                            | Horse #1<br>(S583/20)     | n/a | 74    | 7      |
|            |                                                                            | Horse #2<br>(S617/20)     | n/a | 321   | 95     |
|            |                                                                            | Horse #3<br>(S633/20)     | n/a | 2282  | 229    |
|            |                                                                            | Horse #4<br>(S649/20)     | n/a | 527   | 65     |
|            |                                                                            | Horse #5<br>(S721/20)     | n/a | 240   | 233    |
| Homonidae  | Orangutan ( <i>Pongo sp.</i> )                                             | Orangutan<br>#1 (S794/20) | n/a | 475   | 509    |

<sup>1</sup>CTSL mRNA expression is given as genomic equivalents (GE)/ 1 µg RNA. The table shows mean values for each animal and organ measured as quintuplicates. Threshold: primer pair 1: 0.001.

<sup>2</sup>Abbreviations: CTSL, cathepsin L; n/a, no organ sample available;

**Supplementary Material Table S4.** Sequences of primers used for qPCR and species-specific targets *ACE2*, *TMPRSS2* and *CTSL*.

| GenBank        | Primer          | ACE2 pan1 forward (5'-3')         |   |   |   |   |   |   |   |   |   |   |   |   |   |   |   |   |   |   |   |   |   |
|----------------|-----------------|-----------------------------------|---|---|---|---|---|---|---|---|---|---|---|---|---|---|---|---|---|---|---|---|---|
|                | Primer sequence | C                                 | A | A | G | C | A | C | T | T | A | C | A | A | T | T | G | T | T | G | G | A | A |
| AB211997.1     | Cat             | .                                 | . | . | . | . | . | . | . | . | . | . | . | . | . | . | . | . | . | . | . | . | . |
| XM_027054500.1 | Cheetah         | .                                 | . | . | . | . | . | . | . | . | . | . | . | . | . | . | . | . | . | . | . | . | . |
| XM_014111329.2 | Dog             | .                                 | . | . | . | . | . | . | . | . | . | . | . | . | . | . | . | . | . | . | . | . | . |
| AB208708.1     | Ferret          | .                                 | . | . | . | . | . | . | . | . | . | . | . | . | . | . | . | . | . | . | . | . | . |
| -              | Golden Jackal   | no sequence information available |   |   |   |   |   |   |   |   |   |   |   |   |   |   |   |   |   |   |   |   |   |
| -              | Lion            | no sequence information available |   |   |   |   |   |   |   |   |   |   |   |   |   |   |   |   |   |   |   |   |   |
| XM_030304979.1 | Lynx            | .                                 | . | . | . | . | . | . | . | . | . | . | . | . | . | . | . | . | . | . | . | . | . |
| AB211998.1     | Racoon          | .                                 | . | . | . | . | . | . | . | . | . | . | . | . | . | . | . | . | . | . | . | . | . |
| -              | Red Panda       | no sequence information available |   |   |   |   |   |   |   |   |   |   |   |   |   |   |   |   |   |   |   |   |   |

| GenBank        | Primer          | ACE2 pan1 reverse (5'-3')         |   |   |   |   |   |   |   |   |   |   |   |   |   |   |   |   |   |   |   |   |   |   |   |
|----------------|-----------------|-----------------------------------|---|---|---|---|---|---|---|---|---|---|---|---|---|---|---|---|---|---|---|---|---|---|---|
|                | Primer sequence | T                                 | G | A | G | T | A | A | T | C | A | T | T | A | G | C | A | A | C | A | T | G | G | A | A |
| AB211997.1     | Cat             | .                                 | . | . | . | . | . | . | . | . | . | . | . | . | . | . | . | . | . | . | . | . | . | . | . |
| XM_027054500.1 | Cheetah         | .                                 | . | . | . | . | . | . | . | . | . | . | . | . | . | . | . | . | . | . | . | . | . | . | . |
| XM_014111329.2 | Dog             | .                                 | . | . | . | . | . | . | . | . | . | . | . | . | . | . | . | . | . | . | . | . | . | . | . |
| AB208708.1     | Ferret          | .                                 | . | . | . | . | . | . | . | . | G | . | . | . | . | . | . | . | . | . | . | . | . | . | . |
| -              | Golden Jackal   | no sequence information available |   |   |   |   |   |   |   |   |   |   |   |   |   |   |   |   |   |   |   |   |   |   |   |
| -              | Lion            | no sequence information available |   |   |   |   |   |   |   |   |   |   |   |   |   |   |   |   |   |   |   |   |   |   |   |
| XM_030304979.1 | Lynx            | .                                 | . | . | . | . | . | . | . | . | . | . | . | . | . | . | . | . | . | . | . | . | . | . | . |
| AB211998.1     | Racoon          | C                                 | . | . | . | . | . | . | . | . | . | . | . | . | . | . | . | . | . | . | . | . | . | . | . |
| -              | Red Panda       | no sequence information available |   |   |   |   |   |   |   |   |   |   |   |   |   |   |   |   |   |   |   |   |   |   |   |

| GenBank        | Primer          | ACE2 pan2 forward (5'-3')         |   |   |   |   |   |   |   |   |   |   |   |   |   |   |   |   |   |   |   |
|----------------|-----------------|-----------------------------------|---|---|---|---|---|---|---|---|---|---|---|---|---|---|---|---|---|---|---|
|                | Primer sequence | T                                 | G | G | A | G | G | T | G | G | A | T | G | G | T | C | T | T | T | A | A |
| XM_006212647.3 | Alpaca          | .                                 | . | . | . | . | . | . | . | . | . | . | . | . | . | . | . | . | . | . | . |
| XM_010968001.1 | Camel           | .                                 | . | . | . | . | . | . | . | . | . | . | . | . | . | . | . | . | . | . | . |
| XM_005228428.4 | Cattle          | .                                 | . | . | . | . | . | . | . | . | . | . | . | . | . | . | . | . | . | . | . |
| -              | Giraffe         | no sequence information available |   |   |   |   |   |   |   |   |   |   |   |   |   |   |   |   |   |   |   |
| XM_005701072.3 | Goat            | .                                 | . | . | . | . | . | . | . | . | . | . | . | . | . | . | . | . | . | . | . |
| XM_001490191.5 | Horse           | .                                 | . | . | . | . | . | . | . | . | . | . | . | . | . | . | . | . | . | . | . |
| -              | Moose           | no sequence information available |   |   |   |   |   |   |   |   |   |   |   |   |   |   |   |   |   |   |   |
| -              | Nyala           | no sequence information available |   |   |   |   |   |   |   |   |   |   |   |   |   |   |   |   |   |   |   |
| NM_001131132.2 | Orangutan       | .                                 | . | . | . | . | . | . | . | . | . | . | . | . | . | . | . | . | . | . | . |
| NM_001123070.1 | Pig             | .                                 | . | . | C | . | . | . | . | . | . | . | . | . | . | . | . | . | . | . | . |
| XM_002719845.3 | Rabbit          | .                                 | . | . | . | . | A | . | . | . | . | . | . | . | . | . | . | . | . | . | . |
| XM_012106267.3 | Sheep           | .                                 | . | . | . | . | . | . | . | . | . | . | . | . | . | . | . | . | . | . | . |

| GenBank        | Primer          | ACE2 pan2 reverse (5'-3')         |   |   |   |   |   |   |   |   |   |   |   |   |   |   |   |   |   |   |   |   |   |   |   |
|----------------|-----------------|-----------------------------------|---|---|---|---|---|---|---|---|---|---|---|---|---|---|---|---|---|---|---|---|---|---|---|
|                | Primer sequence | G                                 | A | A | T | T | G | A | T | A | A | A | T | G | G | T | C | C | T | T | G | T | G | T | A |
| XM_006212647.3 | Alpaca          | .                                 | . | . | . | . | . | . | . | . | . | . | . | . | . | . | . | . | . | . | . | . | . | . | . |
| XM_010968001.1 | Camel           | .                                 | . | . | . | . | . | . | . | . | . | . | . | . | . | . | . | . | . | . | . | . | . | . | . |
| XM_005228428.4 | Cattle          | .                                 | . | . | . | . | . | . | . | . | . | . | . | . | . | . | . | . | . | . | . | . | . | . | . |
| -              | Giraffe         | no sequence information available |   |   |   |   |   |   |   |   |   |   |   |   |   |   |   |   |   |   |   |   |   |   |   |
| XM_005701072.3 | Goat            | .                                 | . | . | . | . | . | . | . | . | . | . | . | . | . | . | . | . | . | . | . | . | . | . | . |
| XM_001490191.5 | Horse           | .                                 | . | . | . | . | . | . | . | . | G | . | . | . | . | . | . | . | . | . | . | . | . | . | . |
| -              | Moose           | no sequence information available |   |   |   |   |   |   |   |   |   |   |   |   |   |   |   |   |   |   |   |   |   |   |   |
| -              | Nyala           | no sequence information available |   |   |   |   |   |   |   |   |   |   |   |   |   |   |   |   |   |   |   |   |   |   |   |
| NM_001131132.2 | Orangutan       | .                                 | . | . | . | . | . | G | . | . | . | . | G | . | . | . | . | . | . | . | . | . | . | . | . |
| NM_001123070.1 | Pig             | .                                 | . | . | C | . | . | . | . | . | . | . | . | . | . | . | . | . | . | . | . | . | . | . | . |
| XM_002719845.3 | Rabbit          | .                                 | . | . | . | . | A | . | . | . | . | . | . | T | . | . | . | . | . | G | . | . | . | . | . |

XM\_012106267.3      Sheep      . . . . .

| GenBank        | Primer          | TMPRSS2 pan forward (5'-3')       |   |   |   |   |   |   |   |   |   |   |   |   |   |   |   |   |   |
|----------------|-----------------|-----------------------------------|---|---|---|---|---|---|---|---|---|---|---|---|---|---|---|---|---|
|                | Primer sequence | T                                 | G | G | A | G | G | T | C | C | Y | C | T | G | G | T | C | A | C |
| XM_031684299.1 | Alpaca          | .                                 | . | . | . | . | . | . | . | . | T | . | . | . | . | . | . | . | . |
| XM_010994865.2 | Camel           | C                                 | . | . | . | . | . | . | . | . | T | . | . | . | . | . | . | . | . |
| XM_023238711.1 | Cat             | .                                 | . | . | . | . | . | C | . | . | C | . | . | . | . | . | . | . | . |
| NM_001081585.1 | Cattle          | .                                 | . | . | . | . | . | . | . | . | T | . | . | . | . | . | . | . | . |
| XM_027041576.1 | Cheetah         | .                                 | . | . | . | . | . | C | . | . | C | . | . | . | . | . | . | . | . |
| LC219373.1     | Dog             | C                                 | . | . | . | . | . | . | . | . | C | . | . | . | . | . | . | . | . |
| NM_001386127.1 | Ferret          | C                                 | . | . | . | . | . | . | . | . | C | . | . | . | . | . | . | . | . |
| -              | Giraffe         | no sequence information available |   |   |   |   |   |   |   |   |   |   |   |   |   |   |   |   |   |
| XM_005675629.3 | Goat            | .                                 | . | . | . | . | . | . | . | . | . | . | . | . | . | . | . | . | . |
| -              | Golden Jackal   | no sequence information available |   |   |   |   |   |   |   |   |   |   |   |   |   |   |   |   |   |
| XM_023630207.1 | Horse           | .                                 | . | . | . | . | . | . | . | . | T | . | . | . | . | . | . | . | . |
| XM_042956092.1 | Lion            | .                                 | . | . | . | . | . | C | . | . | C | . | . | . | . | . | . | . | . |
| XM_030330005.1 | Lynx            | .                                 | . | . | . | . | . | C | . | . | C | . | . | . | . | . | . | . | . |
| -              | Moose           | no sequence information available |   |   |   |   |   |   |   |   |   |   |   |   |   |   |   |   |   |
| -              | Nyala           | no sequence information available |   |   |   |   |   |   |   |   |   |   |   |   |   |   |   |   |   |
| XM_024239539.1 | Orangutan       | .                                 | . | . | . | . | . | G | . | . | T | . | . | . | . | . | . | . | . |
| NM_001386131.1 | Pig             | C                                 | . | . | . | . | . | . | . | . | T | . | . | . | . | . | . | . | . |
| NM_001386128.1 | Rabbit          | C                                 | . | . | C | . | . | G | . | . | T | . | . | . | . | . | . | . | . |
| -              | Raccoon         | no sequence information available |   |   |   |   |   |   |   |   |   |   |   |   |   |   |   |   |   |
| -              | Red Panda       | no sequence information available |   |   |   |   |   |   |   |   |   |   |   |   |   |   |   |   |   |
| XM_027960704.2 | Sheep           | .                                 | . | . | . | . | . | . | . | . | T | . | . | . | . | . | . | . | . |

| GenBank        | Primer          | TMPRSS2 pan reverse (5'-3')       |   |   |   |   |   |   |   |   |   |   |   |   |   |   |   |   |   |   |   |
|----------------|-----------------|-----------------------------------|---|---|---|---|---|---|---|---|---|---|---|---|---|---|---|---|---|---|---|
|                | Primer sequence | A                                 | T | T | T | G | T | C | G | A | T | A | R | A | T | C | C | A | G | T | C |
| XM_031684299.1 | Alpaca          | .                                 | . | . | . | . | . | . | . | . | . | . | A | . | . | . | . | . | . | . | . |
| XM_010994865.2 | Camel           | .                                 | . | . | . | . | . | . | . | . | . | . | A | . | . | . | . | . | . | . | . |
| XM_023238711.1 | Cat             | .                                 | . | . | . | . | . | . | . | . | . | . | A | . | . | . | . | . | . | . | . |
| NM_001081585.1 | Cattle          | .                                 | . | . | . | . | . | T | . | . | . | . | G | . | . | . | . | . | . | . | . |
| XM_027041576.1 | Cheetah         | .                                 | . | . | . | . | . | . | . | G | . | . | A | . | . | . | . | . | . | . | . |
| LC219373.1     | Dog             | .                                 | . | . | . | . | C | . | . | . | . | . | A | . | . | . | . | . | . | . | . |
| NM_001386127.1 | Ferret          | .                                 | . | . | . | . | . | . | . | G | . | . | A | . | . | . | . | . | . | . | . |
| -              | Giraffe         | no sequence information available |   |   |   |   |   |   |   |   |   |   |   |   |   |   |   |   |   |   |   |
| XM_005675629.3 | Goat            | .                                 | . | . | . | . | . | . | . | . | . | . | G | . | . | . | . | . | . | . | . |
| -              | Golden Jackal   | no sequence information available |   |   |   |   |   |   |   |   |   |   |   |   |   |   |   |   |   |   |   |
| XM_023630207.1 | Horse           | .                                 | . | C | . | C | . | T | . | G | . | . | G | . | . | . | . | . | . | . | . |
| XM_042956092.1 | Lion            | .                                 | . | . | . | . | . | . | . | . | . | . | A | . | . | . | . | . | . | . | . |
| XM_030330005.1 | Lynx            | .                                 | . | . | . | . | . | . | . | . | . | . | A | . | . | . | . | . | . | . | . |
| -              | Moose           | no sequence information available |   |   |   |   |   |   |   |   |   |   |   |   |   |   |   |   |   |   |   |
| -              | Nyala           | no sequence information available |   |   |   |   |   |   |   |   |   |   |   |   |   |   |   |   |   |   |   |
| XM_024239539.1 | Orangutan       | .                                 | . | . | . | . | . | . | . | . | . | . | A | . | . | . | . | . | . | . | . |
| NM_001386131.1 | Pig             | .                                 | . | . | . | . | . | . | . | . | . | . | A | . | . | . | . | . | . | . | . |
| NM_001386128.1 | Rabbit          | .                                 | . | C | . | . | C | T | . | G | . | . | G | . | . | . | . | . | . | . | . |
| -              | Racoon          | no sequence information available |   |   |   |   |   |   |   |   |   |   |   |   |   |   |   |   |   |   |   |
| -              | Red Panda       | no sequence information available |   |   |   |   |   |   |   |   |   |   |   |   |   |   |   |   |   |   |   |
| XM_027960704.2 | Sheep           | .                                 | . | . | . | . | . | . | . | . | . | . | G | . | . | . | . | . | . | . | . |

[illegible]

| GenBank        | Primer          | CTSL pan reverse (5'-3')          |   |   |   |   |   |   |   |   |   |   |   |   |   |   |   |   |   |   |   |   |   |   |   |
|----------------|-----------------|-----------------------------------|---|---|---|---|---|---|---|---|---|---|---|---|---|---|---|---|---|---|---|---|---|---|---|
|                | Primer sequence | C                                 | C | A | G | T | K | G | C | A | C | T | A | A | A | M | G | C | C | C | A | R | C | A | A |
| XM_006209235.3 | Alpaca          | .                                 | . | . | . | . | G | . | . | . | . | . | . | . | . | G | . | . | . | . | . | A | . | . | . |
| XM_031447264.1 | Camel           | .                                 | . | . | . | . | G | . | . | . | . | . | G | . | . | A | . | . | . | . | . | A | . | . | . |
| XM_011288293.3 | Cat             | .                                 | . | . | . | . | T | . | . | . | . | . | . | . | . | A | . | . | . | . | . | A | . | . | . |
| NM_174032.2    | Cattle          | .                                 | . | . | . | . | G | . | . | . | . | . | . | . | . | C | . | . | . | . | . | A | . | . | . |
| -              | Cheetah         | no sequence information available |   |   |   |   |   |   |   |   |   |   |   |   |   |   |   |   |   |   |   |   |   |   |   |
| XM_038654910.1 | Dog             | .                                 | . | . | . | . | T | . | . | . | . | . | . | . | . | A | . | . | . | . | . | A | . | . | . |
| XM_004777423.3 | Ferret          | .                                 | . | . | . | . | T | . | . | . | . | . | . | . | . | A | . | . | . | . | . | A | . | . | . |
| -              | Giraffe         | no sequence information available |   |   |   |   |   |   |   |   |   |   |   |   |   |   |   |   |   |   |   |   |   |   |   |
| NM_001314266.1 | Goat            | .                                 | . | . | . | . | G | . | . | . | . | . | . | . | . | C | . | . | . | . | . | A | . | . | . |
| -              | Golden Jackal   | no sequence information available |   |   |   |   |   |   |   |   |   |   |   |   |   |   |   |   |   |   |   |   |   |   |   |
| XM_023627064.1 | Horse           | .                                 | . | . | . | . | C | . | . | . | . | . | . | . | . | A | . | . | . | . | . | A | . | . | . |
| XM_042912503.1 | Lion            | .                                 | . | . | . | . | T | . | . | . | . | . | . | . | . | A | . | . | . | . | . | A | . | . | . |
| XM_030293577.1 | Lynx            | .                                 | . | . | . | . | T | . | . | . | . | . | . | . | . | A | . | . | . | . | . | A | . | . | . |
| -              | Moose           | no sequence information available |   |   |   |   |   |   |   |   |   |   |   |   |   |   |   |   |   |   |   |   |   |   |   |
| -              | Nyala           | no sequence information available |   |   |   |   |   |   |   |   |   |   |   |   |   |   |   |   |   |   |   |   |   |   |   |
| XM_002820009.3 | Orangutan       | .                                 | . | . | . | . | C | . | . | . | . | . | . | . | . | A | . | . | . | . | . | A | . | . | . |
| XM_003130633.6 | Pig             | .                                 | . | G | . | . | G | . | . | . | . | . | . | . | . | A | . | . | . | . | . | A | . | . | . |
| XM_002708253.3 | Rabbit          | .                                 | . | . | . | . | G | . | . | . | . | . | G | . | . | A | . | . | . | . | . | A | . | . | . |
| -              | Raccoon         | no sequence information available |   |   |   |   |   |   |   |   |   |   |   |   |   |   |   |   |   |   |   |   |   |   |   |
| -              | Red Panda       | no sequence information available |   |   |   |   |   |   |   |   |   |   |   |   |   |   |   |   |   |   |   |   |   |   |   |
| XM_004004081.4 | Sheep           | .                                 | . | . | . | . | G | . | . | . | . | . | . | . | . | C | . | . | . | . | . | A | . | . | . |

<sup>1</sup>Abbreviations: ACE2, angiotensin-converting enzyme 2; CTSL, cathepsin L; TMPRSS2, transmembrane protease serine subtype 2;



**Supplementary Material Table S5.** Description of evaluation criteria of cytopathic features in culture systems used in the present study.

| Sample | Cytopathic feature                                               | Type of evaluation                                                                                          |
|--------|------------------------------------------------------------------|-------------------------------------------------------------------------------------------------------------|
| NME    | Ciliated epithelial cells                                        | quantitative, (%) in relation to total number of epithelial cells                                           |
|        | Cytoplasmic vacuolization in the epithelium                      |                                                                                                             |
|        | Nuclear degeneration in the epithelium                           |                                                                                                             |
|        | Cytoplasmic vacuolization in the submucosal glands               | quantitative, number of cells with changes in relation to total                                             |
|        | Nuclear degeneration in the submucosal glands                    | number of submucosal glands                                                                                 |
|        | Cytoplasmic vacuolization in the connective tissue               | quantitative, number of cells with changes in relation to total area of                                     |
|        | Nuclear degeneration in the connective tissue                    | connective tissue quantified in HPF                                                                         |
| ALI    | Vascular edema                                                   | semiquantitative, scoring 1-4 (1= none, 2= mild, 3= moderate, 4= severe)                                    |
|        | Total cell count (per HPF)                                       | quantitative                                                                                                |
|        | Ciliated epithelial cells (per HPF)                              | quantitative, (%) in relation to total cell count                                                           |
|        | Cytoplasmic vacuolization (per HPF)                              | quantitative, (%) in relation to total cell count                                                           |
| PCLS   | Nuclear degeneration (per HPF)                                   | quantitative, (%) in relation to total cell count                                                           |
|        | Ciliated epithelial cells                                        | quantitative, (%) in relation to total number of bronchial epithelial cells                                 |
|        | Cytoplasmic vacuolization in the bronchial epithelium            |                                                                                                             |
|        | Nuclear degeneration in the bronchial epithelium                 |                                                                                                             |
|        | Cytoplasmic vacuolization in the peribronchial glands            | quantitative, number of cells with changes in relation to total                                             |
|        | Nuclear degeneration in the peribronchial glands                 | number of peribronchial glands                                                                              |
|        | Cytoplasmic vacuolization in the peribronchial connective tissue | quantitative, number of cells with changes in relation to total area of connective tissue quantified in HPF |
|        | Nuclear degeneration in the peribronchial connective tissue      |                                                                                                             |
|        | Cytoplasmic vacuolization in the alveolar interstitium           |                                                                                                             |
|        | Nuclear degeneration in the alveolar interstitium                | quantitative, number of cells with changes in five HPF                                                      |
|        | Cells in the alveolar lumen                                      |                                                                                                             |
|        | Vascular edema                                                   | semiquantitative, scoring 1-4 (1= none, 2= mild, 3= moderate, 4= severe)                                    |

<sup>1</sup>Abbreviations: ALI, air-liquid interface cultures; HPF, high power field (400x magnification); NME, nasal mucosa explants; PCLS, precision-cut lung slices;

**Supplementary Material Table S6.** Primary antibodies used for immunofluorescence (IF) and immunohistochemistry (IHC).

| Antibody                                          | Specificity                         | Target                           | Dilution | Positive control (from the investigated species)                           |
|---------------------------------------------------|-------------------------------------|----------------------------------|----------|----------------------------------------------------------------------------|
| SARS-CoV-2 NP<br>(SinoBiological - 40143); IF     | Mouse, Monoclonal,<br>clone #05     | SARS-CoV-2<br>nucleoprotein (NP) | 1:500    | Hamster lung,<br>experimentally infected<br>with SARS-CoV-2 [50], 1<br>dpi |
| Caspase-3<br>(Promega - G748A); IHC               | Rabbit, Polyclonal                  | apoptotic cells                  | 1:200    | lymph node                                                                 |
| CD204<br>(Abnova Corporation -<br>MAB1710); IHC   | Mouse, Monoclonal<br>clone SRA-E5   | macrophages                      | 1:500    | lymph node                                                                 |
| $\alpha$ -tubulin<br>(Sigma-Aldrich - T6793); IHC | Mouse, Monoclonal,<br>clone 6-11B-1 | ciliated cells                   | 1:100    | brain                                                                      |
| Ki67<br>(DakoCytomation - GA62661-2);<br>IHC      | Mouse, Monoclonal,<br>clone MIB-1   | proliferating cells              | 1:100    | intestine                                                                  |

<sup>1</sup>Abbreviations: CD204, cluster of differentiation 204; dpi, days post infection; SARS-CoV-2, severe acute respiratory syndrome coronavirus 2;

**Supplementary Material Table S7.** Light microscopic evaluation of hematoxylin and eosin stained culture systems. Pairwise comparisons of controls and SARS-CoV-2 infected samples, p-values significant at  $\leq 0,05$  obtained by Mann-Whitney-U tests.

| days p.i.                 | Group                     | Median  | p-value |
|---------------------------|---------------------------|---------|---------|
| Total cell count          |                           |         |         |
| 1                         | ALI cow (control)         | 231,000 | 0,114   |
| 1                         | ALI cow (SARS-CoV-2)      | 200,000 |         |
| 5                         | ALI cow (control)         | 196,500 | 0,007   |
| 5                         | ALI cow (SARS-CoV-2)      | 167,000 |         |
| Ciliated epithelial cells |                           |         |         |
| 1                         | NME dog (control)         | 0,000   | 0,743   |
| 1                         | NME dog (SARS-CoV-2)      | 0,000   |         |
| 2                         | NME dog (control)         | 0,646   | 1,000   |
| 2                         | NME dog (SARS-CoV-2)      | 0,976   |         |
| 3                         | NME dog (control)         | 0,000   | 0,748   |
| 3                         | NME dog (SARS-CoV-2)      | 0,000   |         |
| 4                         | NME dog (control)         | 0,000   | 0,750   |
| 4                         | NME dog (SARS-CoV-2)      | 0,000   |         |
| 1                         | ALI cow (control)         | 14,894  | 0,756   |
| 1                         | ALI cow (SARS-CoV-2)      | 12,097  |         |
| 5                         | ALI cow (control)         | 12,571  | 0,000   |
| 5                         | ALI cow (SARS-CoV-2)      | 23,940  |         |
| 1                         | PCLS dog (control)        | 1,563*  | 0,400   |
| 1                         | PCLS dog (SARS-CoV-2)     | 2,145   |         |
| 2                         | PCLS dog (control)        | n.e.    | n.e.    |
| 2                         | PCLS dog (SARS-CoV-2)     | 0,000   |         |
| 3                         | PCLS dog (control)        | n.e.    | n.e.    |
| 3                         | PCLS dog (SARS-CoV-2)     | n.e.    |         |
| 4                         | PCLS dog (control)        | 0,000*  | 1,000   |
| 4                         | PCLS dog (SARS-CoV-2)     | 0,000*  |         |
| 1                         | PCLS hamster (control)    | 67,368  | 0,400   |
| 1                         | PCLS hamster (SARS-CoV-2) | 75,510  |         |
| 2                         | PCLS hamster (control)    | 45,983  | 1,000   |
| 2                         | PCLS hamster (SARS-CoV-2) | 32,268  |         |
| 3                         | PCLS hamster (control)    | 54,151  | 0,667   |
| 3                         | PCLS hamster (SARS-CoV-2) | 81,928* |         |
| 4                         | PCLS hamster (control)    | 81,035  | 1,000   |
| 4                         | PCLS hamster (SARS-CoV-2) | 78,723  |         |
| 1                         | PCLS human (control)      | 45,674  | 0,333   |
| 1                         | PCLS human (SARS-CoV-2)   | 73,462  |         |
| 2                         | PCLS human (control)      | 74,324  | 1,000   |
| 2                         | PCLS human (SARS-CoV-2)   | 55,131  |         |
| 3                         | PCLS human (control)      | 62,157  | 0,667   |

|                                                             |                           |         |       |
|-------------------------------------------------------------|---------------------------|---------|-------|
| 3                                                           | PCLS human (SARS-CoV-2)   | 20,635* | 0,667 |
| 4                                                           | PCLS human (control)      | 70,427  |       |
| 4                                                           | PCLS human (SARS-CoV-2)   | 78,782  |       |
| Cytoplasmic vacuolisation (epithelium)                      |                           |         |       |
| 1                                                           | NME dog (control)         | 1,792   | 0,481 |
| 1                                                           | NME dog (SARS-CoV-2)      | 2,788   |       |
| 2                                                           | NME dog (control)         | 2,865   | 0,700 |
| 2                                                           | NME dog (SARS-CoV-2)      | 4,434   |       |
| 3                                                           | NME dog (control)         | 6,122   | 0,332 |
| 3                                                           | NME dog (SARS-CoV-2)      | 3,650   |       |
| 4                                                           | NME dog (control)         | 4,221   | 0,617 |
| 4                                                           | NME dog (SARS-CoV-2)      | 3,509   |       |
| 1                                                           | ALI cow (control)         | 28,804  | 0,017 |
| 1                                                           | ALI cow (SARS-CoV-2)      | 21,223  |       |
| 5                                                           | ALI cow (control)         | 25,210  | 0,417 |
| 5                                                           | ALI cow (SARS-CoV-2)      | 27,439  |       |
| 1                                                           | PCLS dog (control)        | 1,563*  | 0,800 |
| 1                                                           | PCLS dog (SARS-CoV-2)     | 2,610   |       |
| 2                                                           | PCLS dog (control)        | n.e.    | n.e.  |
| 2                                                           | PCLS dog (SARS-CoV-2)     | 0,000   |       |
| 3                                                           | PCLS dog (control)        | n.e.    | n.e.  |
| 3                                                           | PCLS dog (SARS-CoV-2)     | 0,000   |       |
| 4                                                           | PCLS dog (control)        | 0,000   | 1,000 |
| 4                                                           | PCLS dog (SARS-CoV-2)     | 5,660   |       |
| 1                                                           | PCLS hamster (control)    | 1,630   | 1,000 |
| 1                                                           | PCLS hamster (SARS-CoV-2) | 1,415   |       |
| 2                                                           | PCLS hamster (control)    | 1,548   | 1,000 |
| 2                                                           | PCLS hamster (SARS-CoV-2) | 1,635   |       |
| 3                                                           | PCLS hamster (control)    | 1,409   | 1,000 |
| 3                                                           | PCLS hamster (SARS-CoV-2) | 1,205   |       |
| 4                                                           | PCLS hamster (control)    | 1,724   | 0,383 |
| 4                                                           | PCLS hamster (SARS-CoV-2) | 1,418   |       |
| 1                                                           | PCLS human (control)      | 2,150   | 0,333 |
| 1                                                           | PCLS human (SARS-CoV-2)   | 3,932   |       |
| 2                                                           | PCLS human (control)      | 2,783   | 1,000 |
| 2                                                           | PCLS human (SARS-CoV-2)   | 2,643   |       |
| 3                                                           | PCLS human (control)      | 3,391   | 1,000 |
| 3                                                           | PCLS human (SARS-CoV-2)   | 2,381*  |       |
| 4                                                           | PCLS human (control)      | 2,699   | 1,000 |
| 4                                                           | PCLS human (SARS-CoV-2)   | 1,263   |       |
| Cytoplasmic vacuolisation (submucosal/peribronchial glands) |                           |         |       |
| 1                                                           | NME dog (control)         | 0,349   | 0,739 |
| 1                                                           | NME dog (SARS-CoV-2)      | 0,275   |       |
| 2                                                           | NME dog (control)         | 0,412   | 1,000 |
| 2                                                           | NME dog (SARS-CoV-2)      | 0,546   |       |
| 3                                                           | NME dog (control)         | 0,400   | 0,519 |

|                                               |                           |        |       |
|-----------------------------------------------|---------------------------|--------|-------|
| 3                                             | NME dog (SARS-CoV-2)      | 0,286  |       |
| 4                                             | NME dog (control)         | 0,231  | 0,842 |
| 4                                             | NME dog (SARS-CoV-2)      | 0,250  |       |
| 1                                             | PCLS dog (control)        | 0,250* | 0,400 |
| 1                                             | PCLS dog (SARS-CoV-2)     | 0,528  |       |
| 2                                             | PCLS dog (control)        | 0,000* | 0,800 |
| 2                                             | PCLS dog (SARS-CoV-2)     | 0,071  |       |
| 3                                             | PCLS dog (control)        | 0,083* | 0,500 |
| 3                                             | PCLS dog (SARS-CoV-2)     | 0,000  |       |
| 4                                             | PCLS dog (control)        | 0,000* | 0,800 |
| 4                                             | PCLS dog (SARS-CoV-2)     | 0,056  |       |
| 1                                             | PCLS hamster (control)    | 0,000* | 1,000 |
| 1                                             | PCLS hamster (SARS-CoV-2) | 0,000* |       |
| 2                                             | PCLS hamster (control)    | n.e.   | n.e.  |
| 2                                             | PCLS hamster (SARS-CoV-2) | n.e.   |       |
| 3                                             | PCLS hamster (control)    | n.e.   | n.e.  |
| 3                                             | PCLS hamster (SARS-CoV-2) | n.e.   |       |
| 4                                             | PCLS hamster (control)    | 0,000* | 1,000 |
| 4                                             | PCLS hamster (SARS-CoV-2) | 0,000* |       |
| 1                                             | PCLS human (control)      | 0,000* | 1,000 |
| 1                                             | PCLS human (SARS-CoV-2)   | 0,000* |       |
| 2                                             | PCLS human (control)      | 2,000* | n.a   |
| 2                                             | PCLS human (SARS-CoV-2)   | n.e.   |       |
| 3                                             | PCLS human (control)      | 1,000* | n.a   |
| 3                                             | PCLS human (SARS-CoV-2)   | n.e.   |       |
| 4                                             | PCLS human (control)      | n.e.   | n.a   |
| 4                                             | PCLS human (SARS-CoV-2)   | n.e.   |       |
| Cytoplasmic vacuolisation (connective tissue) |                           |        |       |
| 1                                             | NME dog (control)         | 0,000  | 1,000 |
| 1                                             | NME dog (SARS-CoV-2)      | 0,000  |       |
| 2                                             | NME dog (control)         | 0,000  | 1,000 |
| 2                                             | NME dog (SARS-CoV-2)      | 0,000  |       |
| 3                                             | NME dog (control)         | 0,000  | 1,000 |
| 3                                             | NME dog (SARS-CoV-2)      | 0,000  |       |
| 4                                             | NME dog (control)         | 0,000  | 1,000 |
| 4                                             | NME dog (SARS-CoV-2)      | 0,000  |       |
| 1                                             | PCLS dog (control)        | 0,000* | 1,000 |
| 1                                             | PCLS dog (SARS-CoV-2)     | 0,000  |       |
| 2                                             | PCLS dog (control)        | 0,000* | 1,000 |
| 2                                             | PCLS dog (SARS-CoV-2)     | 0,000  |       |
| 3                                             | PCLS dog (control)        | 0,000* | 1,000 |
| 3                                             | PCLS dog (SARS-CoV-2)     | 0,000  |       |
| 4                                             | PCLS dog (control)        | 0,000* | 1,000 |
| 4                                             | PCLS dog (SARS-CoV-2)     | 0,000  |       |
| 1                                             | PCLS hamster (control)    | 0,000  | 1,000 |
| 1                                             | PCLS hamster (SARS-CoV-2) | 0,000  |       |

|                                                   |                           |        |       |
|---------------------------------------------------|---------------------------|--------|-------|
| 2                                                 | PCLS hamster (control)    | 0,250  | 0,667 |
| 2                                                 | PCLS hamster (SARS-CoV-2) | 0,000  |       |
| 3                                                 | PCLS hamster (control)    | 0,000  | 1,000 |
| 3                                                 | PCLS hamster (SARS-CoV-2) | 0,000* |       |
| 4                                                 | PCLS hamster (control)    | 0,000  | 0,683 |
| 4                                                 | PCLS hamster (SARS-CoV-2) | 0,000  |       |
| 1                                                 | PCLS human (control)      | 0,000  | 1,000 |
| 1                                                 | PCLS human (SARS-CoV-2)   | 0,000  |       |
| 2                                                 | PCLS human (control)      | 0,000  | 1,000 |
| 2                                                 | PCLS human (SARS-CoV-2)   | 0,000  |       |
| 3                                                 | PCLS human (control)      | 0,000  | 1,000 |
| 3                                                 | PCLS human (SARS-CoV-2)   | 0,000* |       |
| 4                                                 | PCLS human (control)      | 0,000  | 1,000 |
| 4                                                 | PCLS human (SARS-CoV-2)   | 0,000  |       |
| Cytoplasmic vacuolisation (alveolar interstitium) |                           |        |       |
| 1                                                 | PCLS dog (control)        | 0,000  | 0,974 |
| 1                                                 | PCLS dog (SARS-CoV-2)     | 0,000  |       |
| 2                                                 | PCLS dog (control)        | 0,000  | 0,371 |
| 2                                                 | PCLS dog (SARS-CoV-2)     | 0,000  |       |
| 3                                                 | PCLS dog (control)        | 0,000  | 0,530 |
| 3                                                 | PCLS dog (SARS-CoV-2)     | 0,000  |       |
| 4                                                 | PCLS dog (control)        | 0,000  | 0,717 |
| 4                                                 | PCLS dog (SARS-CoV-2)     | 0,000  |       |
| 1                                                 | PCLS hamster (control)    | 1,000  | 0,744 |
| 1                                                 | PCLS hamster (SARS-CoV-2) | 1,000  |       |
| 2                                                 | PCLS hamster (control)    | 0,000  | 0,056 |
| 2                                                 | PCLS hamster (SARS-CoV-2) | 0,000  |       |
| 3                                                 | PCLS hamster (control)    | 0,000  | 0,512 |
| 3                                                 | PCLS hamster (SARS-CoV-2) | 0,000  |       |
| 4                                                 | PCLS hamster (control)    | 0,000  | 0,769 |
| 4                                                 | PCLS hamster (SARS-CoV-2) | 0,000  |       |
| 1                                                 | PCLS human (control)      | 0,000  | 0,481 |
| 1                                                 | PCLS human (SARS-CoV-2)   | 0,000  |       |
| 2                                                 | PCLS human (control)      | 0,000  | 0,739 |
| 2                                                 | PCLS human (SARS-CoV-2)   | 0,000  |       |
| 3                                                 | PCLS human (control)      | 0,000  | 0,481 |
| 3                                                 | PCLS human (SARS-CoV-2)   | 0,000  |       |
| 4                                                 | PCLS human (control)      | 0,000  | 0,481 |
| 4                                                 | PCLS human (SARS-CoV-2)   | 0,000  |       |
| Nuclear degeneration (epithelium)                 |                           |        |       |
| 1                                                 | NME dog (control)         | 0,785  | 0,200 |
| 1                                                 | NME dog (SARS-CoV-2)      | 1,604  |       |
| 2                                                 | NME dog (control)         | 1,302  | 0,700 |
| 2                                                 | NME dog (SARS-CoV-2)      | 3,179  |       |
| 3                                                 | NME dog (control)         | 1,914  | 0,699 |
| 3                                                 | NME dog (SARS-CoV-2)      | 3,398  |       |

|                                                        |                           |        |       |
|--------------------------------------------------------|---------------------------|--------|-------|
| 4                                                      | NME dog (control)         | 2,625  | 0,820 |
| 4                                                      | NME dog (SARS-CoV-2)      | 3,680  |       |
| 1                                                      | ALI cow (control)         | 6,957  | 0,349 |
| 1                                                      | ALI cow (SARS-CoV-2)      | 6,299  |       |
| 5                                                      | ALI cow (control)         | 6,254  | 0,830 |
| 5                                                      | ALI cow (SARS-CoV-2)      | 5,955  |       |
| 1                                                      | PCLS dog (control)        | 1,563* | 1,000 |
| 1                                                      | PCLS dog (SARS-CoV-2)     | 1,453  |       |
| 2                                                      | PCLS dog (control)        | n.e.   | n.e.  |
| 2                                                      | PCLS dog (SARS-CoV-2)     | 0,909  |       |
| 3                                                      | PCLS dog (control)        | n.e.   | n.e.  |
| 3                                                      | PCLS dog (SARS-CoV-2)     | n.e.   |       |
| 4                                                      | PCLS dog (control)        | 0,000* | 1,000 |
| 4                                                      | PCLS dog (SARS-CoV-2)     | 3,774* |       |
| 1                                                      | PCLS hamster (control)    | 2,105  | 0,400 |
| 1                                                      | PCLS hamster (SARS-CoV-2) | 4,082  |       |
| 2                                                      | PCLS hamster (control)    | 5,380  | 0,333 |
| 2                                                      | PCLS hamster (SARS-CoV-2) | 9,056  |       |
| 3                                                      | PCLS hamster (control)    | 9,674  | 0,667 |
| 3                                                      | PCLS hamster (SARS-CoV-2) | 3,615* |       |
| 4                                                      | PCLS hamster (control)    | 4,310  | 0,833 |
| 4                                                      | PCLS hamster (SARS-CoV-2) | 4,478  |       |
| 1                                                      | PCLS human (control)      | 1,465  | 0,333 |
| 1                                                      | PCLS human (SARS-CoV-2)   | 3,932  |       |
| 2                                                      | PCLS human (control)      | 2,285  | 0,333 |
| 2                                                      | PCLS human (SARS-CoV-2)   | 0,983  |       |
| 3                                                      | PCLS human (control)      | 1,215  | 0,667 |
| 3                                                      | PCLS human (SARS-CoV-2)   | 3,175* |       |
| 4                                                      | PCLS human (control)      | 2,081  | 0,333 |
| 4                                                      | PCLS human (SARS-CoV-2)   | 0,936  |       |
| Nuclear degeneration (submucosal/peribronchial glands) |                           |        |       |
| 1                                                      | NME dog (control)         | 0,354  | 0,105 |
| 1                                                      | NME dog (SARS-CoV-2)      | 0,145  |       |
| 2                                                      | NME dog (control)         | 0,375  | 0,700 |
| 2                                                      | NME dog (SARS-CoV-2)      | 0,455  |       |
| 3                                                      | NME dog (control)         | 0,429  | 0,949 |
| 3                                                      | NME dog (SARS-CoV-2)      | 0,417  |       |
| 4                                                      | NME dog (control)         | 0,444  | 0,445 |
| 4                                                      | NME dog (SARS-CoV-2)      | 0,428  |       |
| 1                                                      | PCLS dog (control)        | 0,500* | 0,800 |
| 1                                                      | PCLS dog (SARS-CoV-2)     | 0,330  |       |
| 2                                                      | PCLS dog (control)        | 2,000* | 0,400 |
| 2                                                      | PCLS dog (SARS-CoV-2)     | 0,615  |       |
| 3                                                      | PCLS dog (control)        | 0,583* | 0,500 |
| 3                                                      | PCLS dog (SARS-CoV-2)     | 0,800  |       |
| 4                                                      | PCLS dog (control)        | 1,000* | 0,400 |

|                                                 |                           |        |       |
|-------------------------------------------------|---------------------------|--------|-------|
| 4                                               | PCLS dog (SARS-CoV-2)     | 0,528  |       |
| 1                                               | PCLS hamster (control)    | 1,000* | 1,000 |
| 1                                               | PCLS hamster (SARS-CoV-2) | 2,000* |       |
| 2                                               | PCLS hamster (control)    | n.e.   | n.e.  |
| 2                                               | PCLS hamster (SARS-CoV-2) | n.e.   |       |
| 3                                               | PCLS hamster (control)    | n.e.   | n.e.  |
| 3                                               | PCLS hamster (SARS-CoV-2) | n.e.   |       |
| 4                                               | PCLS hamster (control)    | 2,000* | 1,000 |
| 4                                               | PCLS hamster (SARS-CoV-2) | 3,000* |       |
| 1                                               | PCLS human (control)      | 1,000* | 1,000 |
| 1                                               | PCLS human (SARS-CoV-2)   | 0,000* |       |
| 2                                               | PCLS human (control)      | 1,000* | n.e.  |
| 2                                               | PCLS human (SARS-CoV-2)   | n.e.   |       |
| 3                                               | PCLS human (control)      | 0,000* | n.e.  |
| 3                                               | PCLS human (SARS-CoV-2)   | n.e.   |       |
| 4                                               | PCLS human (control)      | n.e.   | n.e.  |
| 4                                               | PCLS human (SARS-CoV-2)   | n.e.   |       |
| <b>Nuclear degeneration (connective tissue)</b> |                           |        |       |
| 1                                               | NME dog (control)         | 0,888  | 0,436 |
| 1                                               | NME dog (SARS-CoV-2)      | 0,976  |       |
| 2                                               | NME dog (control)         | 2,444  | 1,000 |
| 2                                               | NME dog (SARS-CoV-2)      | 2,667  |       |
| 3                                               | NME dog (control)         | 1,056  | 0,519 |
| 3                                               | NME dog (SARS-CoV-2)      | 0,889  |       |
| 4                                               | NME dog (control)         | 0,831  | 0,407 |
| 4                                               | NME dog (SARS-CoV-2)      | 1,557  |       |
| 1                                               | PCLS dog (control)        | 1,500* | 0,800 |
| 1                                               | PCLS dog (SARS-CoV-2)     | 1,196  |       |
| 2                                               | PCLS dog (control)        | 2,000* | 0,800 |
| 2                                               | PCLS dog (SARS-CoV-2)     | 3,150  |       |
| 3                                               | PCLS dog (control)        | 0,909* | 0,500 |
| 3                                               | PCLS dog (SARS-CoV-2)     | 5,163  |       |
| 4                                               | PCLS dog (control)        | 4,000* | 0,800 |
| 4                                               | PCLS dog (SARS-CoV-2)     | 4,171  |       |
| 1                                               | PCLS hamster (control)    | 2,000  | 0,700 |
| 1                                               | PCLS hamster (SARS-CoV-2) | 7,333  |       |
| 2                                               | PCLS hamster (control)    | 9,083  | 0,667 |
| 2                                               | PCLS hamster (SARS-CoV-2) | 4,500  |       |
| 3                                               | PCLS hamster (control)    | 4,000  | 0,667 |
| 3                                               | PCLS hamster (SARS-CoV-2) | 7,333* |       |
| 4                                               | PCLS hamster (control)    | 3,000  | 0,683 |
| 4                                               | PCLS hamster (SARS-CoV-2) | 3,000  |       |
| 1                                               | PCLS human (control)      | 0,900  | 1,000 |
| 1                                               | PCLS human (SARS-CoV-2)   | 1,250  |       |
| 2                                               | PCLS human (control)      | 1,083  | 0,333 |
| 2                                               | PCLS human (SARS-CoV-2)   | 0,750  |       |



|                                              |                           |        |       |
|----------------------------------------------|---------------------------|--------|-------|
| 3                                            | PCLS human (control)      | 0,543  | 0,667 |
| 3                                            | PCLS human (SARS-CoV-2)   | 0,000* |       |
| 4                                            | PCLS human (control)      | 1,550  | 0,333 |
| 4                                            | PCLS human (SARS-CoV-2)   | 1,129  |       |
| Nuclear degeneration (alveolar interstitium) |                           |        |       |
| 1                                            | PCLS dog (control)        | 0,000  | 0,071 |
| 1                                            | PCLS dog (SARS-CoV-2)     | 1,000  |       |
| 2                                            | PCLS dog (control)        | 1,000  | 0,169 |
| 2                                            | PCLS dog (SARS-CoV-2)     | 0,000  |       |
| 3                                            | PCLS dog (control)        | 0,000  | 0,097 |
| 3                                            | PCLS dog (SARS-CoV-2)     | 0,500  |       |
| 4                                            | PCLS dog (control)        | 2,000  | 0,000 |
| 4                                            | PCLS dog (SARS-CoV-2)     | 0,000  |       |
| 1                                            | PCLS hamster (control)    | 3,000  | 0,775 |
| 1                                            | PCLS hamster (SARS-CoV-2) | 2,000  |       |
| 2                                            | PCLS hamster (control)    | 5,000  | 0,436 |
| 2                                            | PCLS hamster (SARS-CoV-2) | 6,000  |       |
| 3                                            | PCLS hamster (control)    | 7,000  | 0,161 |
| 3                                            | PCLS hamster (SARS-CoV-2) | 2,000  |       |
| 4                                            | PCLS hamster (control)    | 6,500  | 0,663 |
| 4                                            | PCLS hamster (SARS-CoV-2) | 5,000  |       |
| 1                                            | PCLS human (control)      | 1,000  | 0,529 |
| 1                                            | PCLS human (SARS-CoV-2)   | 1,000  |       |
| 2                                            | PCLS human (control)      | 1,000  | 0,190 |
| 2                                            | PCLS human (SARS-CoV-2)   | 0,000  |       |
| 3                                            | PCLS human (control)      | 1,000  | 0,353 |
| 3                                            | PCLS human (SARS-CoV-2)   | 0,500  |       |
| 4                                            | PCLS human (control)      | 0,500  | 0,912 |
| 4                                            | PCLS human (SARS-CoV-2)   | 0,000  |       |
| Cells in alveolar lumen                      |                           |        |       |
| 1                                            | PCLS dog (control)        | 1,000  | 0,575 |
| 1                                            | PCLS dog (SARS-CoV-2)     | 2,000  |       |
| 2                                            | PCLS dog (control)        | 4,000  | 0,006 |
| 2                                            | PCLS dog (SARS-CoV-2)     | 1,000  |       |
| 3                                            | PCLS dog (control)        | 0,000  | 0,083 |
| 3                                            | PCLS dog (SARS-CoV-2)     | 2,000  |       |
| 4                                            | PCLS dog (control)        | 2,000  | 0,192 |
| 4                                            | PCLS dog (SARS-CoV-2)     | 1,000  |       |
| 1                                            | PCLS hamster (control)    | 1,000  | 0,116 |
| 1                                            | PCLS hamster (SARS-CoV-2) | 0,000  |       |
| 2                                            | PCLS hamster (control)    | 0,000  | 0,202 |
| 2                                            | PCLS hamster (SARS-CoV-2) | 0,000  |       |
| 3                                            | PCLS hamster (control)    | 0,000  | 0,325 |
| 3                                            | PCLS hamster (SARS-CoV-2) | 0,000  |       |
| 4                                            | PCLS hamster (control)    | 0,000  | 0,989 |
| 4                                            | PCLS hamster (SARS-CoV-2) | 0,000  |       |

|                |                           |        |       |
|----------------|---------------------------|--------|-------|
| 1              | PCLS human (control)      | 1,000  | 0,579 |
| 1              | PCLS human (SARS-CoV-2)   | 0,500  |       |
| 2              | PCLS human (control)      | 0,000  | 0,247 |
| 2              | PCLS human (SARS-CoV-2)   | 0,500  |       |
| 3              | PCLS human (control)      | 0,000  | 0,436 |
| 3              | PCLS human (SARS-CoV-2)   | 0,000  |       |
| 4              | PCLS human (control)      | 0,500  | 0,912 |
| 4              | PCLS human (SARS-CoV-2)   | 1,000  |       |
| Vascular edema |                           |        |       |
| 1              | NME dog (control)         | 1,000  | 0,143 |
| 1              | NME dog (SARS-CoV-2)      | 1,000  |       |
| 2              | NME dog (control)         | 1,000  | 1,000 |
| 2              | NME dog (SARS-CoV-2)      | 1,000  |       |
| 3              | NME dog (control)         | 1,000  | 0,654 |
| 3              | NME dog (SARS-CoV-2)      | 1,000  |       |
| 4              | NME dog (control)         | 1,000  | 0,240 |
| 4              | NME dog (SARS-CoV-2)      | 2,000  |       |
| 1              | PCLS dog (control)        | 4,000* | 1,000 |
| 1              | PCLS dog (SARS-CoV-2)     | 4,000  |       |
| 2              | PCLS dog (control)        | 4,000* | 1,000 |
| 2              | PCLS dog (SARS-CoV-2)     | 4,000  |       |
| 3              | PCLS dog (control)        | 4,000* | 1,000 |
| 3              | PCLS dog (SARS-CoV-2)     | 4,000  |       |
| 4              | PCLS dog (control)        | 1,000* | 0,500 |
| 4              | PCLS dog (SARS-CoV-2)     | 4,000  |       |
| 1              | PCLS hamster (control)    | 4,000  | 1,000 |
| 1              | PCLS hamster (SARS-CoV-2) | 4,000  |       |
| 2              | PCLS hamster (control)    | 4,000  | 1,000 |
| 2              | PCLS hamster (SARS-CoV-2) | 4,000* |       |
| 3              | PCLS hamster (control)    | 4,000  | 1,000 |
| 3              | PCLS hamster (SARS-CoV-2) | 4,000  |       |
| 4              | PCLS hamster (control)    | 4,000  | 1,000 |
| 4              | PCLS hamster (SARS-CoV-2) | 4,000  |       |
| 1              | PCLS human (control)      | 3,000* | 0,667 |
| 1              | PCLS human (SARS-CoV-2)   | 4,000  |       |
| 2              | PCLS human (control)      | 4,000  | 1,000 |
| 2              | PCLS human (SARS-CoV-2)   | 4,000  |       |
| 3              | PCLS human (control)      | 4,000  | 1,000 |
| 3              | PCLS human (SARS-CoV-2)   | 4,000  |       |
| 4              | PCLS human (control)      | 4,000* | 1,000 |
| 4              | PCLS human (SARS-CoV-2)   | 4,000  |       |

<sup>1\*</sup> this value is based on one cell culture

<sup>2</sup>The bold font indicates significance.

<sup>3</sup>Abbreviations: ALL, air-liquid interface cultures; dpi, days post infection; n.e., not evaluable, due to lack of target structure; NME, nasal mucosa explants; PCLS, precision-cut lung slices; SARS-CoV-2, severe acute respiratory syndrome coronavirus 2;

**Supplementary Material Table S8.** Light microscopic evaluation of immunohistochemically stained culture systems. Pairwise comparisons of controls and SARS-CoV-2 infected samples, p-values significant at  $\leq 0,05$  obtained by Mann-Whitney-U tests.

| days p.i.                | Group                     | Median  | p-value |
|--------------------------|---------------------------|---------|---------|
| α-tubulin positive cells |                           |         |         |
| 1                        | NME dog (control)         | 0,000   | 0,842   |
| 1                        | NME dog (SARS-CoV-2)      | 0,000   |         |
| 2                        | NME dog (control)         | 0,182   | 0,700   |
| 2                        | NME dog (SARS-CoV-2)      | 0,625   |         |
| 3                        | NME dog (control)         | 0,000   | 1,000   |
| 3                        | NME dog (SARS-CoV-2)      | 0,000   |         |
| 4                        | NME dog (control)         | 0,000   | 0,842   |
| 4                        | NME dog (SARS-CoV-2)      | 0,000   |         |
| 1                        | ALI cow (control)         | 14,890  | 0,756   |
| 1                        | ALI cow (SARS-CoV-2)      | 12,100  |         |
| 5                        | ALI cow (control)         | 12,570  | 0,000   |
| 5                        | ALI cow (SARS-CoV-2)      | 23,610  |         |
| 1                        | PCLS dog (control)        | 0,3333* | 0,400   |
| 1                        | PCLS dog (SARS-CoV-2)     | 0,875   |         |
| 2                        | PCLS dog (control)        | n.e.    | n.e.    |
| 2                        | PCLS dog (SARS-CoV-2)     | 0,000   |         |
| 3                        | PCLS dog (control)        | 0*      | 1,000   |
| 3                        | PCLS dog (SARS-CoV-2)     | 0,000   |         |
| 4                        | PCLS dog (control)        | n.e.    | n.e.    |
| 4                        | PCLS dog (SARS-CoV-2)     | 0,000   |         |
| 1                        | PCLS hamster (control)    | 31,000  | 0,400   |
| 1                        | PCLS hamster (SARS-CoV-2) | 40,000  |         |
| 2                        | PCLS hamster (control)    | 14,738  | 1,000   |
| 2                        | PCLS hamster (SARS-CoV-2) | 15,417  |         |
| 3                        | PCLS hamster (control)    | 13,733  | 1,000   |
| 3                        | PCLS hamster (SARS-CoV-2) | 16,667  |         |
| 4                        | PCLS hamster (control)    | 29,417  | 0,933   |
| 4                        | PCLS hamster (SARS-CoV-2) | 28,600  |         |
| 1                        | PCLS human (control)      | 27,551  | 1,000   |
| 1                        | PCLS human (SARS-CoV-2)   | 28,333  |         |
| 2                        | PCLS human (control)      | 25,558  | 0,667   |
| 2                        | PCLS human (SARS-CoV-2)   | 16,857  |         |
| 3                        | PCLS human (control)      | 34,717  | 0,667   |
| 3                        | PCLS human (SARS-CoV-2)   | 7,600*  |         |
| 4                        | PCLS human (control)      | 22,750  | 0,333   |
| 4                        | PCLS human (SARS-CoV-2)   | 32,182  |         |
| Caspase-3 positive cells |                           |         |         |
| 1                        | NME dog (control)         | 9,500   | 0,739   |

|                     |                           |        |       |
|---------------------|---------------------------|--------|-------|
| 1                   | NME dog (SARS-CoV-2)      | 8,500  |       |
| 2                   | NME dog (control)         | 15,000 | 0,700 |
| 2                   | NME dog (SARS-CoV-2)      | 13,000 |       |
| 3                   | NME dog (control)         | 5,000  | 0,019 |
| 3                   | NME dog (SARS-CoV-2)      | 9,000  |       |
| 4                   | NME dog (control)         | 6,500  | 0,261 |
| 4                   | NME dog (SARS-CoV-2)      | 8,000  |       |
| 1                   | ALI cow (control)         | 0,010  | 0,756 |
| 1                   | ALI cow (SARS-CoV-2)      | 0,020  |       |
| 5                   | ALI cow (control)         | 1,820  | 0,618 |
| 5                   | ALI cow (SARS-CoV-2)      | 2,096  |       |
| 1                   | PCLS dog (control)        | 15*    | 0,800 |
| 1                   | PCLS dog (SARS-CoV-2)     | 13,500 |       |
| 2                   | PCLS dog (control)        | 8*     | 0,400 |
| 2                   | PCLS dog (SARS-CoV-2)     | 13,000 |       |
| 3                   | PCLS dog (control)        | 14*    | 0,800 |
| 3                   | PCLS dog (SARS-CoV-2)     | 9,500  |       |
| 4                   | PCLS dog (control)        | 17*    | 1,000 |
| 4                   | PCLS dog (SARS-CoV-2)     | 15,500 |       |
| 1                   | PCLS hamster (control)    | 6,000  | 1,000 |
| 1                   | PCLS hamster (SARS-CoV-2) | 6,000  |       |
| 2                   | PCLS hamster (control)    | 7,000  | 0,700 |
| 2                   | PCLS hamster (SARS-CoV-2) | 10,000 |       |
| 3                   | PCLS hamster (control)    | 11,000 | 0,400 |
| 3                   | PCLS hamster (SARS-CoV-2) | 10,000 |       |
| 4                   | PCLS hamster (control)    | 5,500  | 0,607 |
| 4                   | PCLS hamster (SARS-CoV-2) | 7,000  |       |
| 1                   | PCLS human (control)      | 4,500  | 0,667 |
| 1                   | PCLS human (SARS-CoV-2)   | 2,000  |       |
| 2                   | PCLS human (control)      | 6,500  | 0,333 |
| 2                   | PCLS human (SARS-CoV-2)   | 2,500  |       |
| 3                   | PCLS human (control)      | 9,000  | 0,667 |
| 3                   | PCLS human (SARS-CoV-2)   | 7,000  |       |
| 4                   | PCLS human (control)      | 13,500 | 1,000 |
| 4                   | PCLS human (SARS-CoV-2)   | 14,500 |       |
| Ki67 positive cells |                           |        |       |
| 1                   | NME dog (control)         | 10,500 | 0,853 |
| 1                   | NME dog (SARS-CoV-2)      | 9,000  |       |
| 2                   | NME dog (control)         | 9,000  | 0,400 |
| 2                   | NME dog (SARS-CoV-2)      | 20,000 |       |
| 3                   | NME dog (control)         | 6,000  | 0,047 |
| 3                   | NME dog (SARS-CoV-2)      | 12,000 |       |
| 4                   | NME dog (control)         | 5,500  | 0,641 |
| 4                   | NME dog (SARS-CoV-2)      | 7,000  |       |
| 1                   | ALI cow (control)         | 0,355  | 0,594 |
| 1                   | ALI cow (SARS-CoV-2)      | 0,500  |       |

|                      |                           |        |       |
|----------------------|---------------------------|--------|-------|
| 5                    | ALI cow (control)         | 1,239  | 0,004 |
| 5                    | ALI cow (SARS-CoV-2)      | 2,786  |       |
| 1                    | PCLS dog (control)        | 3*     | 0,800 |
| 1                    | PCLS dog (SARS-CoV-2)     | 3,500  |       |
| 2                    | PCLS dog (control)        | 0*     | 0,400 |
| 2                    | PCLS dog (SARS-CoV-2)     | 1,000  |       |
| 3                    | PCLS dog (control)        | 2*     | 0,800 |
| 3                    | PCLS dog (SARS-CoV-2)     | 1,000  |       |
| 4                    | PCLS dog (control)        | 5*     | 0,400 |
| 4                    | PCLS dog (SARS-CoV-2)     | 0,500  |       |
| 1                    | PCLS hamster (control)    | 2,000  | 0,400 |
| 1                    | PCLS hamster (SARS-CoV-2) | 3,000  |       |
| 2                    | PCLS hamster (control)    | 2,000  | 0,400 |
| 2                    | PCLS hamster (SARS-CoV-2) | 1,000  |       |
| 3                    | PCLS hamster (control)    | 1,000  | 0,400 |
| 3                    | PCLS hamster (SARS-CoV-2) | 2,000  |       |
| 4                    | PCLS hamster (control)    | 2,500  | 0,607 |
| 4                    | PCLS hamster (SARS-CoV-2) | 3,000  |       |
| 1                    | PCLS human (control)      | 6,500  | 1,000 |
| 1                    | PCLS human (SARS-CoV-2)   | 5,500  |       |
| 2                    | PCLS human (control)      | 10,500 | 0,333 |
| 2                    | PCLS human (SARS-CoV-2)   | 7,000  |       |
| 3                    | PCLS human (control)      | 8,500  | 1,000 |
| 3                    | PCLS human (SARS-CoV-2)   | 9,500  |       |
| 4                    | PCLS human (control)      | 3,000  | 0,667 |
| 4                    | PCLS human (SARS-CoV-2)   | 4,000  |       |
| CD204 positive cells |                           |        |       |
| 1                    | NME dog (control)         | 8,000  | 0,631 |
| 1                    | NME dog (SARS-CoV-2)      | 7,000  |       |
| 2                    | NME dog (control)         | 14,000 | 0,700 |
| 2                    | NME dog (SARS-CoV-2)      | 18,000 |       |
| 3                    | NME dog (control)         | 7,000  | 0,088 |
| 3                    | NME dog (SARS-CoV-2)      | 12,000 |       |
| 4                    | NME dog (control)         | 4,500  | 0,115 |
| 4                    | NME dog (SARS-CoV-2)      | 6,500  |       |
| 1                    | PCLS dog (control)        | 7*     | 0,800 |
| 1                    | PCLS dog (SARS-CoV-2)     | 12,000 |       |
| 2                    | PCLS dog (control)        | 2*     | 0,400 |
| 2                    | PCLS dog (SARS-CoV-2)     | 8,500  |       |
| 3                    | PCLS dog (control)        | 4*     | 0,400 |
| 3                    | PCLS dog (SARS-CoV-2)     | 10,000 |       |
| 4                    | PCLS dog (control)        | 9*     | 0,800 |
| 4                    | PCLS dog (SARS-CoV-2)     | 6,500  |       |
| 1                    | PCLS hamster (control)    | 11,000 | 0,700 |
| 1                    | PCLS hamster (SARS-CoV-2) | 8,000  |       |
| 2                    | PCLS hamster (control)    | 7,000  | 0,100 |

|   |                           |        |       |
|---|---------------------------|--------|-------|
| 2 | PCLS hamster (SARS-CoV-2) | 4,000  |       |
| 3 | PCLS hamster (control)    | 10,000 | 0,400 |
| 3 | PCLS hamster (SARS-CoV-2) | 15,000 |       |
| 4 | PCLS hamster (control)    | 14,500 | 0,272 |
| 4 | PCLS hamster (SARS-CoV-2) | 19,000 |       |
| 1 | PCLS human (control)      | 6,000  | 0,667 |
| 1 | PCLS human (SARS-CoV-2)   | 10,000 |       |
| 2 | PCLS human (control)      | 11,000 | 1,000 |
| 2 | PCLS human (SARS-CoV-2)   | 13,000 |       |
| 3 | PCLS human (control)      | 8,000  | 1,000 |
| 3 | PCLS human (SARS-CoV-2)   | 10,000 |       |
| 4 | PCLS human (control)      | 7,500  | 0,667 |
| 4 | PCLS human (SARS-CoV-2)   | 8,500  |       |

<sup>1\*</sup> this value is based on one cell culture

<sup>2</sup>The bold font indicates significance.

<sup>3</sup>Abbreviations: ALI, air-liquid interface cultures; dpi, days post infection; n.e., not evaluable, due to lack of target structure; NME, nasal mucosa explants; PCLS, precision-cut lung slices; SARS-CoV-2, severe acute respiratory syndrome coronavirus 2;
